# Supplementary material
Source: PubMed Central journal article supplement (PMC9006782)
Supplement: NEJMe2201380_disclosures.pdf [file NEJMe2201380_disclosures.pdf]

Disclosure Purpose: 22-01380

Summary of Interests

| Company or Organization                                                                                                                                                                 |                  |                                                                                 |
|-----------------------------------------------------------------------------------------------------------------------------------------------------------------------------------------|------------------|---------------------------------------------------------------------------------|
| Entity                                                                                                                                                                                  | Type             | Interest Held By                                                                |
| GlaxoSmithKline                                                                                                                                                                         | Grant / Contract | Self                                                                            |
| <i>Recipient Name:</i> Kaiser Foundation Research Institute<br><i>Grant / Contract Description:</i> unrelated studies<br><i>Additional Information:</i>                                 |                  | <i>Recipient Type:</i> Institution<br><i>Grant / Contract Purpose:</i> Research |
| Merck                                                                                                                                                                                   | Grant / Contract | Self                                                                            |
| <i>Recipient Name:</i> Kaiser Foundation Research Institute<br><i>Grant / Contract Description:</i> unrelated studies<br><i>Additional Information:</i>                                 |                  | <i>Recipient Type:</i> Institution<br><i>Grant / Contract Purpose:</i> Research |
| Pfizer                                                                                                                                                                                  | Grant / Contract | Self                                                                            |
| <i>Recipient Name:</i> Kaiser Foundation Research Institute<br><i>Grant / Contract Description:</i> research support for COVID vaccine clinical trial<br><i>Additional Information:</i> |                  | <i>Recipient Type:</i> Institution<br><i>Grant / Contract Purpose:</i> Research |
| Protein Science                                                                                                                                                                         | Grant / Contract | Self                                                                            |
| <i>Recipient Name:</i> Kaiser Foundation Research Institute<br><i>Grant / Contract Description:</i> unrelated studies<br><i>Additional Information:</i>                                 |                  | <i>Recipient Type:</i> Institution<br><i>Grant / Contract Purpose:</i> Research |
| SANOFI PASTEUR INC.                                                                                                                                                                     | Grant / Contract | Self                                                                            |
| <i>Recipient Name:</i> Kaiser Foundation Research Institute<br><i>Grant / Contract Description:</i> unrelated studies<br><i>Additional Information:</i>                                 |                  | <i>Recipient Type:</i> Institution<br><i>Grant / Contract Purpose:</i> Research |

Certification

I certify that the information provided in this disclosure is complete and accurate.
